# Supplementary material
Source: PubMed Central journal article supplement (PMC4927099)
Supplement: NIHMS794507-supplement-Supp_Inf.pdf [file NIHMS794507-supplement-Supp_Inf.pdf]

# Supplementary Material for “Contribution of Charged Groups to the Enthalpic Stabilization of the Folded States of Globular Proteins”

Voichita M. Dadarlat and Carol Beth Post\*

Department of Medicinal Chemistry and Molecular Pharmacology,  
Markey Center for Structural Biology, Purdue Cancer Center  
Purdue University, West Lafayette, IN 47907

November 18, 2007

---

\*This work was partially supported by grants from the U.S. National Institutes of Health (AI39639 to C. B. P.) and the Sloan Foundation and DOE (to V. M. D.)

## Table Captions for Supplementary Material

### Table 1S.

Enthalpy of unfolding and nonbonded energy for CH<sub>3</sub> groups in apolar residues and dipeptides.

### Table 2S.

The “unfolded state” nonbonded energy (in kcal/mol), and time average solvent accessible surface areas,  $\langle SA \rangle$  (in Å<sup>2</sup>), of apolar and charged groups for solvated dipeptides and Ca<sup>2+</sup>.

### Table 3S.

Enthalpic contribution of charged groups to protein folded state stability in TRPS. Non-bonded energy of group  $g$ ,  $\langle E_{nb}^g \rangle$ , (in kcal/mol), time average SASA,  $\langle SA \rangle$  (in Å<sup>2</sup>), Exposure to solvent,  $SE$ , (in %), and enthalpic gain upon folding,  $\Delta H_g^U$ , solvent reorganization,  $\Delta H_h^U$ , and total enthalpy change,  $\Delta H^U = \Delta H_g^U + \Delta H_h^U$  (in kcal/mol).

### Table 4S.

Enthalpic contribution of charged groups to protein folded state stability in RBNA. Non-bonded energy of group  $g$ ,  $\langle E_{nb}^g \rangle$ , (in kcal/mol); time average SASA,  $\langle SA \rangle$  (in Å<sup>2</sup>); Exposure to solvent,  $SE$ , (in %); and enthalpic gain upon folding,  $\Delta H_g^U$ , the change in enthalpy upon solvent reorganization,  $\Delta H_h^U$ , and the total enthalpy change,  $\Delta H^U = \Delta H_g^U + \Delta H_h^U$  (in kcal/mol).

### Table 5S.

Enthalpic contribution of charged groups to protein folded state stability in HLYSO. Non-bonded energy of group  $g$ ,  $\langle E_{nb}^g \rangle$ , (in kcal/mol); time average SASA,  $\langle SA \rangle$  (in Å<sup>2</sup>); exposure to solvent,  $SE$ , (in %); and enthalpic gain upon unfolding from environmental change,  $\Delta H_g^U$ , solvent reorganization,  $\Delta H_h^U$ , and the total change,  $\Delta H^U = \Delta H_g^U + \Delta H_h^U$  (in kcal/mol).

### Table 6S.

Enthalpic contribution of charged groups in ALACTA. Nonbonded energy of group  $g$ ,  $\langle E_{nb}^g \rangle$ , (in kcal/mol); time average SASA,  $\langle SA \rangle$  (in Å<sup>2</sup>); exposure to solvent,  $SE$ , (in %); enthalpic gain upon folding from charged groups,  $\Delta H_g^U$ , solvent reorganization,  $\Delta H_h^U$ , and the net change in enthalpy,  $\Delta H^U$  (in kcal/mol).

### Table 7S.

Contribution of solvent “reorganization” to the change in system enthalpy upon protein unfolding: the average number of water molecules in the first, second and third hydration

shells,  $N_w^{1st}$ ,  $N_w^{2nd}$ ,  $N_w^{3rd}$ ; the average nonbonded energy for each,  $\langle E_{nb}^{1st} \rangle$ ,  $\langle E_{nb}^{2nd} \rangle$ ,  $\langle E_{nb}^{3rd} \rangle$ ; the change in enthalpy of a water molecule,  $\Delta H_w^{1st}$ ,  $\Delta H_w^{2nd}$ ,  $\Delta H_w^{3rd}$ ; and the maximum change in solvent enthalpy upon complete charged group burial,  $\Delta H_h^{max}$ . Energies are in kcal/mol.  $\Delta H_w^{shell}$  is calculated as the difference between  $\langle E_{nb}^{1st} \rangle$  and the average nonbonded energy of a water molecule in the dipeptide solution, -9.2 kcal/mol.

**Table 8S.**

Enthalpy of unfolding - change in local environment of charged group upon protein unfolding,  $\Delta H_g^U$  (kcal/mol), summed over charged groups of a given type as a function of exposure to solvent, SE, (in %). Group averages,  $\overline{\Delta H_g^U}$ , are averages over each charged group type in the indicated SE range, from 4 proteins. Global averages,  $\widetilde{\Delta H_g^U}$ , are averages over all charged groups in 4 proteins in the indicated SE range.

**Table 9S.**

Enthalpy of unfolding - contribution from solvent reorganization and structural collapse,  $\Delta H_h^U$  (kcal/mol), summed over charged groups of a given type as a function of exposure to solvent, SE, (in %). Group averages,  $\overline{\Delta H_h^U}$ , are averages over each charged group type in the indicated SE range, from 4 proteins. Global averages,  $\widetilde{\Delta H_h^U}$ , are averages over all charged groups in 4 proteins in the indicated SE range.

Table 1: Enthalpy of folding and nonbonded energy for terminal CH<sub>3</sub> groups in apolar amino acids and their analog dipeptides

| Group                                            | $\langle E_{nb}^{g,dipep(g)} \rangle$ | $\langle E_{nb}^{g,prot} \rangle$ | $\Delta H_g^U$ |
|--------------------------------------------------|---------------------------------------|-----------------------------------|----------------|
| CH <sub>3</sub> (alad)                           | +2.2                                  | -                                 | -              |
| C $\delta_1$ ( $\delta_2$ )H <sub>3</sub> (vald) | -5.5                                  | -                                 | -              |
| C $\gamma_1$ ( $\gamma_2$ )H <sub>3</sub> (leud) | -13.1                                 | -                                 | -              |
| C $\gamma_2$ H <sub>3</sub> (iled)               | +1.2                                  | -                                 | -              |
| CH <sub>3</sub> (ALA)                            |                                       | .2 - .8                           | .8 - 1.5       |
| CH <sub>3</sub> (VAL)                            |                                       | -5.5 - 6.6                        | .0 - .6        |
| CH <sub>3</sub> (ILE)                            |                                       | .8 - -2.6                         | +1.0 - 1.9     |
| CH <sub>3</sub> (LEU)                            |                                       | -14.2 - -15.2                     | .6 - 1.1       |
| Average                                          |                                       |                                   | $\propto$ +1.3 |

Table 2: The “unfolded state” nonbonded energy (in kcal/mol), and time average solvent accessible surface areas,  $\langle SA \rangle$  (in  $\text{\AA}^2$ ), of apolar and charged groups for solvated dipeptides and  $\text{Ca}^{2+}$ .

| Group                                        | $\langle E_{nb}^{g,dipep(g)} \rangle$ | $\langle SA^{g,dipep(g)} \rangle$ |
|----------------------------------------------|---------------------------------------|-----------------------------------|
| $\text{CH}_3(\text{alad})$                   | +2.25                                 | 77                                |
| $\text{C}_{\gamma_1}\text{H}_3(\text{vald})$ | -5.6                                  | 68                                |
| $\text{C}_{\gamma_2}\text{H}_3(\text{vald})$ | -5.2                                  | 63                                |
| $\text{C}_{\delta_1}\text{H}_3(\text{leud})$ | -13.2                                 | 71                                |
| $\text{C}_{\delta_2}\text{H}_3(\text{leud})$ | -13.2                                 | 70                                |
| $\text{C}_{\delta}\text{H}_3(\text{iled})$   | +1.23                                 | 77                                |
| $\text{C}_{\gamma_2}\text{H}_3(\text{iled})$ | -1.82                                 | 61                                |
| $\text{COO}^-(\text{aspd})$                  | -201                                  | 97                                |
| $\text{COO}^-(\text{glud})$                  | -184                                  | 98                                |
| $\text{Gu}(\text{argd})$                     | -72                                   | 142                               |
| $\text{NH}_3^+(\text{lysd})$                 | -86                                   | 59                                |
| $\text{Ca}^{2+}$                             | -606                                  | 122                               |

Table 3: Enthalpic contribution of charged groups to protein folded state stability in TRPS. Nonbonded energy of group  $g$ ,  $\langle E_{nb}^g \rangle$ , (in kcal/mol), time average SASA,  $\langle SA \rangle$  (in  $\text{\AA}^2$ ), Exposure to solvent,  $SE$ , (in %), and enthalpic gain upon folding,  $\Delta H_g^U$ , solvent reorganization,  $\Delta H_h^U$ , and total enthalpy change,  $\Delta H^U = \Delta H_g^U + \Delta H_h^U$  (in kcal/mol).

| Group                                 | $\langle E_{nb}^g \rangle$ | $\langle SA \rangle$ | SE  | $\Delta H_g^U$ | $\Delta H_h^U$ | $\Delta H^U$ |
|---------------------------------------|----------------------------|----------------------|-----|----------------|----------------|--------------|
| COO <sup>-</sup> (ASP84)              | -210.5                     | 0                    | 0   | +4.8           | 2.4            | 7.2          |
| COO <sup>-</sup> (ASP176)             | -216.0                     | 0                    | 0   | +7.5           | 2.4            | 9.9          |
| COO <sup>-</sup> (ASP171)             | -191                       | 2                    | 2   | -5             | 2.4            | -2.6         |
| COO <sup>-</sup> (ASP145)             | -227.5                     | 52                   | 52  | +13.3          | 1.2            | 14.5         |
| COO <sup>-</sup> (ASP133)             | -200.5                     | 79                   | 81  | -.3            | .5             | .2           |
| COO <sup>-</sup> (ASP53)              | -201.5                     | 17                   | 18  | +.3            | 1.2            | 1.5          |
| COO <sup>-</sup> (GLU62)              | -202.0                     | 0                    | 0   | +9             | 1.7            | 10.7         |
| COO <sup>-</sup> (GLU52)              | -208.0                     | 0                    | 0   | +12            | 1.7            | 13.7         |
| COO <sup>-</sup> (GLU59)              | -191                       | 44                   | 45  | +3.5           | .9             | 4.4          |
| COO <sup>-</sup> (GLU167)             | -185.8                     | 99                   | 100 | +.9            | 0.0            | .9           |
| Gu(ARG49)                             | -69.5                      | 37                   | 26  | -1.3           | 1.4            | .1           |
| Gu(ARG99)                             | -74.8                      | 94                   | 67  | +1.4           | .6             | 2.0          |
| NH <sub>3</sub> <sup>+</sup> (LYS43)  | -82.5                      | 18                   | 31  | -1.8           | .5             | -1.3         |
| NH <sub>3</sub> <sup>+</sup> (LYS69)  | -84.2                      | 37                   | 63  | -.9            | .4             | -.5          |
| NH <sub>3</sub> <sup>+</sup> (LYS89)  | -91.1                      | 27                   | 46  | +2.6           | .6             | 3.2          |
| NH <sub>3</sub> <sup>+</sup> (LYS91)  | -79.6                      | 40                   | 68  | -3.2           | .4             | -2.8         |
| NH <sub>3</sub> <sup>+</sup> (LYS125) | -87.3                      | 54                   | 92  | +.7            | .1             | .8           |
| NH <sub>3</sub> <sup>+</sup> (LYS136) | -84.0                      | 29                   | 49  | -1.0           | .6             | -.4          |
| NH <sub>3</sub> <sup>+</sup> (LYS139) | -87.4                      | 50                   | 84  | +.7            | .2             | .9           |
| NH <sub>3</sub> <sup>+</sup> (LYS149) | -89                        | 10                   | 16  | +1.5           | .9             | 2.4          |
| NH <sub>3</sub> <sup>+</sup> (LYS170) | -85.6                      | 39                   | 66  | -.2            | .4             | .2           |
| NH <sub>3</sub> <sup>+</sup> (LYS186) | -86.3                      | 32                   | 54  | +.2            | .5             | .7           |
| NH <sub>3</sub> <sup>+</sup> (LYS200) | -86.2                      | 36                   | 62  | +.1            | .4             | .5           |
| NH <sub>3</sub> <sup>+</sup> (LYS202) | -85.7                      | 38                   | 66  | -.2            | .4             | .2           |
| NH <sub>3</sub> <sup>+</sup> (LYS208) | -90.3                      | 28                   | 48  | +2.2           | .6             | 2.8          |
| NH <sub>3</sub> <sup>+</sup> (LYS217) | -89.4                      | 45                   | 76  | +1.7           | .3             | 2.0          |

Table 4: Enthalpic contribution of charged groups to protein folded state stability in RBNA. Nonbonded energy of group  $g$ ,  $\langle E_{nb}^g \rangle$ , (in kcal/mol); time average SASA,  $\langle SA \rangle$  (in  $\text{\AA}^2$ ); Exposure to solvent,  $SE$ , (in %); and enthalpic gain upon folding,  $\Delta H_g^U$ , the change in enthalpy upon solvent reorganization,  $\Delta H_h^U$ , and the total enthalpy change,  $\Delta H^U = \Delta H_g^U + \Delta H_h^U$  (in kcal/mol)

| Group                                 | $\langle E_{nb}^g \rangle$ | $\langle SA \rangle$ | SE  | $\Delta H_g^U$ | $\Delta H_h^U$ | $\Delta H^U$ |
|---------------------------------------|----------------------------|----------------------|-----|----------------|----------------|--------------|
| COO <sup>-</sup> (ASP14)              | -197.7                     | 14                   | 14  | -1.7           | 2.1            | .4           |
| COO <sup>-</sup> (ASP38)              | -220.8                     | 59                   | 61  | +9.9           | .9             | 10.8         |
| COO <sup>-</sup> (ASP53)              | -199.0                     | 61                   | 63  | -1.0           | .9             | -.1          |
| COO <sup>-</sup> (ASP83)              | -225.4                     | 22                   | 23  | +12.2          | 1.8            | 14.0         |
| COO <sup>-</sup> (ASP121)             | -212.5                     | 8                    | 8   | +5.8           | 2.2            | 8.0          |
| COO <sup>-</sup> (GLU2)               | -209.5                     | 28                   | 29  | +12.8          | 1.2            | 14.0         |
| COO <sup>-</sup> (GLU9)               | -191.0                     | 82                   | 84  | +3.5           | .3             | 3.8          |
| COO <sup>-</sup> (GLU49)              | -177.9                     | 41                   | 42  | -3.1           | 1.0            | -2.1         |
| COO <sup>-</sup> (GLU86)              | -192                       | 38                   | 38  | +4             | 1.1            | 5.1          |
| COO <sup>-</sup> (GLU111)             | -178.8                     | 79                   | 80  | -2.6           | .3             | -2.3         |
| Gu(ARG10)                             | -73.8                      | 26                   | 18  | +.9            | 1.6            | 2.5          |
| Gu(ARG33)                             | -75.8                      | 33                   | 23  | +1.9           | 1.5            | 3.4          |
| Gu(ARG39)                             | -71.7                      | 101                  | 72  | -.2            | .5             | .3           |
| Gu(ARG85)                             | -75.4                      | 61                   | 43  | +1.7           | 1.1            | 2.8          |
| NH <sub>3</sub> <sup>+</sup> (LYS1)   | -82.6                      | 58                   | 100 | -1.7           | 0.0            | -1.7         |
| NH <sub>3</sub> <sup>+</sup> (LYS7)   | -81.6                      | 9                    | 15  | -2.2           | .9             | -1.3         |
| NH <sub>3</sub> <sup>+</sup> (LYS31)  | -83.5                      | 44                   | 75  | -1.3           | .3             | -1.0         |
| NH <sub>3</sub> <sup>+</sup> (LYS37)  | -91.3                      | 29                   | 50  | +2.7           | .6             | 3.3          |
| NH <sub>3</sub> <sup>+</sup> (LYS41)  | -77.9                      | 15                   | 25  | -4.1           | .8             | -3.3         |
| NH <sub>3</sub> <sup>+</sup> (LYS61)  | -91.8                      | 48                   | 82  | +2.9           | .2             | 3.1          |
| NH <sub>3</sub> <sup>+</sup> (LYS66)  | -85.4                      | 30                   | 51  | -.3            | .5             | .2           |
| NH <sub>3</sub> <sup>+</sup> (LYS91)  | -82.0                      | 33                   | 55  | -2.0           | .5             | -1.5         |
| NH <sub>3</sub> <sup>+</sup> (LYS98)  | -84.3                      | 56                   | 95  | -.9            | .1             | -.8          |
| NH <sub>3</sub> <sup>+</sup> (LYS104) | -92.4                      | 35                   | 59  | +3.7           | .5             | 4.2          |

Table 5: Enthalpic contribution of charged groups to protein folded state stability in HLYSO. Nonbonded energy of group  $g$ ,  $\langle E_{nb}^g \rangle$ , (in kcal/mol); time average SASA,  $\langle SA \rangle$  (in  $\text{\AA}^2$ ); exposure to solvent,  $SE$ , (in %); and enthalpic gain upon unfolding from environmental change,  $\Delta H_g^U$ , solvent reorganization,  $\Delta H_h^U$ , and the total change,  $\Delta H^U = \Delta H_g^U + \Delta H_h^U$  (in kcal/mol).

| Group                                 | $\langle E_{nb}^g \rangle$ | $\langle SA \rangle$ | SE  | $\Delta H_g^U$ | $\Delta H_h^U$ | $\Delta H^U$ |
|---------------------------------------|----------------------------|----------------------|-----|----------------|----------------|--------------|
| COO <sup>-</sup> (ASP48)              | -218.0                     | 25                   | 25  | +8.5           | 1.8            | 10.3         |
| COO <sup>-</sup> (ASP66)              | -216.0                     | 1                    | 0   | +7.5           | 2.4            | 9.9          |
| COO <sup>-</sup> (ASP18)              | -201.5                     | 36                   | 37  | +.3            | 1.5            | 1.8          |
| COO <sup>-</sup> (ASP52)              | -191.0                     | 20                   | 21  | -5.0           | 1.9            | -3.1         |
| COO <sup>-</sup> (ASP87)              | -213.3                     | 48                   | 49  | +6.2           | 1.2            | 7.4          |
| COO <sup>-</sup> (ASP101)             | -212.5                     | 55                   | 56  | +5.8           | 1.1            | 6.9          |
| COO <sup>-</sup> (ASP119)             | -202.0                     | 61                   | 63  | +.5            | .9             | 1.4          |
| COO <sup>-</sup> (GLU7)               | -181.2                     | 61                   | 62  | -1.4           | .6             | -.8          |
| COOH(GLU35)                           | -52.3                      | 16                   | -   | -              |                |              |
| Gu(ARG5)                              | -68.2                      | 45                   | 32  | -1.9           | 1.6            | -.3          |
| Gu(ARG14)                             | -74.9                      | 136                  | 97  | +1.5           | .1             | 1.6          |
| Gu(ARG21)                             | -72.3                      | 101                  | 72  | +.2            | .7             | .9           |
| Gu(ARG45)                             | -73.4                      | 78                   | 55  | +.7            | 1.1            | 1.8          |
| Gu(ARG61)                             | -78.2                      | 27                   | 19  | +3.1           | 1.9            | 5.0          |
| Gu(ARG68)                             | -69.6                      | 128                  | 91  | -1.2           | .2             | -1.0         |
| Gu(ARG73)                             | -68.4                      | 91                   | 65  | -1.8           | .8             | -1.0         |
| Gu(ARG112)                            | -74.3                      | 73                   | 52  | +1.2           | 1.2            | 2.4          |
| Gu(ARG114)                            | -74.2                      | 97                   | 69  | +1.1           | .7             | 1.8          |
| Gu(ARG125)                            | -76.8                      | 67                   | 48  | +2.4           | 1.2            | 3.6          |
| Gu(ARG128)                            | -67.4                      | 140                  | 100 | -2.2           | 0              | -2.2         |
| NH <sub>3</sub> <sup>+</sup> (LYS13)  | -87.8                      | 38                   | 65  | +.9            | .4             | 1.3          |
| NH <sub>3</sub> <sup>+</sup> (LYS33)  | -82.3                      | 41                   | 70  | -1.9           | .3             | -1.6         |
| NH <sub>3</sub> <sup>+</sup> (LYS96)  | -82.2                      | 37                   | 62  | -1.9           | .4             | -1.5         |
| NH <sub>3</sub> <sup>+</sup> (LYS97)  | -89.0                      | 38                   | 65  | +1.5           | .4             | 1.9          |
| NH <sub>3</sub> <sup>+</sup> (LYS116) | -88.1                      | 35                   | 59  | +1.1           | .5             | 1.6          |



Table 6: Enthalpic contribution of charged groups in ALACTA. Nonbonded energy of group  $g$ ,  $\langle E_{nb}^g \rangle$ , (in kcal/mol); time average SASA,  $\langle SA \rangle$  (in  $\text{\AA}^2$ ); exposure to solvent,  $SE$ , (in %); enthalpic gain upon folding from charged groups,  $\Delta H_g^U$ , solvent reorganization,  $\Delta H_h^U$ , and the net change in enthalpy,  $\Delta H^U$  (in kcal/mol).

| Group                                 | $\langle E_{nb}^g \rangle$ | $\langle SA \rangle$ | SE  | $\Delta H_g^U$ | $\Delta H_h^U$ | $\Delta H^U$ |
|---------------------------------------|----------------------------|----------------------|-----|----------------|----------------|--------------|
| COO <sup>-</sup> (ASP15)              | -210.2                     | 63                   | 64  | +4.6           | .9             | 5.5          |
| COO <sup>-</sup> (ASP38)              | -203.5                     | 39                   | 40  | +1.3           | 1.5            | 2.8          |
| COO <sup>-</sup> (ASP47)              | -217.5                     | 34                   | 34  | +8.3           | 1.6            | 9.9          |
| COO <sup>-</sup> (ASP65)              | -189.0                     | 84                   | 86  | -6.0           | .3             | -5.7         |
| COO <sup>-</sup> (ASP79)              | -204.0                     | 32                   | 33  | +1.5           | 1.6            | 3.1          |
| COO <sup>-</sup> (ASP83)              | -218.4                     | 13                   | 13  | +8.7           | 2.1            | 10.8         |
| COO <sup>-</sup> (ASP84)              | -189.4                     | 63                   | 64  | -5.8           | .9             | -4.9         |
| COO <sup>-</sup> (ASP85)              | -192.2                     | 44                   | 64  | -4.4           | .9             | -3.5         |
| COO <sup>-</sup> (ASP88)              | -218.0                     | 16                   | 17  | +8.5           | 2.0            | 10.5         |
| COO <sup>-</sup> (ASP89)              | -213.3                     | 0                    | 0   | +6.2           | 2.4            | 8.6          |
| COO <sup>-</sup> (ASP117)             | -201.4                     | 52                   | 53  | +.2            | 1.1            | 1.3          |
| COO <sup>-</sup> (GLU2)               | -181.0                     | 96                   | 98  | -1.5           | 0.0            | -1.5         |
| COO <sup>-</sup> (GLU8)               | -182.9                     | 44                   | 45  | -.6            | .9             | .3           |
| COO <sup>-</sup> (GLU12)              | -180.8                     | 31                   | 32  | -1.6           | 1.2            | -.4          |
| COO <sup>-</sup> (GLU26)              | -188.6                     | 36                   | 36  | +2.3           | 1.1            | 3.3          |
| COO <sup>-</sup> (GLU50)              | -189.5                     | 50                   | 51  | +2.8           | .8             | 3.6          |
| COO <sup>-</sup> (GLU114)             | -181.4                     | 84                   | 86  | -1.3           | .2             | -1.1         |
| COO <sup>-</sup> (GLU122)             | -178                       | 83                   | 85  | -3.0           | .3             | -2.7         |
| Gu(ARG11)                             | -82.4                      | 141                  | 100 | +5.2           | 0.0            | 5.2          |
| NH <sub>3</sub> <sup>+</sup> (LYS6)   | -82.7                      | 40                   | 68  | -1.7           | .4             | -1.3         |
| NH <sub>3</sub> <sup>+</sup> (LYS14)  | -91.5                      | 37                   | 62  | +2.8           | .4             | 3.2          |
| NH <sub>3</sub> <sup>+</sup> (LYS17)  | -89.2                      | 47                   | 80  | +1.6           | .2             | 1.8          |
| NH <sub>3</sub> <sup>+</sup> (LYS59)  | -89.8                      | 33                   | 56  | +1.9           | .5             | 2.4          |
| NH <sub>3</sub> <sup>+</sup> (LYS63)  | -84.0                      | 2.6                  | 4   | -1.0           | 1.1            | .1           |
| NH <sub>3</sub> <sup>+</sup> (LYS80)  | -88.0                      | 40                   | 68  | +2.0           | .4             | 2.4          |
| NH <sub>3</sub> <sup>+</sup> (LYS94)  | -82.6                      | 36                   | 60  | -1.7           | .4             | -1.3         |
| NH <sub>3</sub> <sup>+</sup> (LYS95)  | -78                        | 16                   | 27  | -4.0           | .8             | -3.2         |
| NH <sub>3</sub> <sup>+</sup> (LYS109) | -81.4                      | 50                   | 85  | -2.3           | .2             | -2.1         |
| NH <sub>3</sub> <sup>+</sup> (LYS115) | -82.6                      | 33                   | 55  | -1.7           | .5             | -1.2         |
| NH <sub>3</sub> <sup>+</sup> (LYS123) | -80.1                      | 37                   | 62  | -3.0           | .4             | -2.6         |

Table 7: Contribution of solvent “reorganization” to the change in system enthalpy upon protein unfolding: the average number of water molecules in the first, second and third hydration shells,  $N_w^1$ ,  $N_w^2$ ,  $N_w^3$ ; the average nonbonded energy for each,  $E_{nb}^1$ ,  $E_{nb}^2$ ,  $E_{nb}^3$ ; the change in enthalpy of a water molecule for each hydration shell,  $\Delta H_w^1$ ,  $\Delta H_w^2$ ,  $\Delta H_w^3$ ; and the maximum change in solvent enthalpy upon complete charged group burial,  $\Delta H_h^{max}$ . Energies are in kcal/mol. For each shell,  $\Delta H_w^{sh}$  is calculated as the difference between  $E_{nb}^{sh}$  and the average nonbonded energy of a water molecule in the dipeptide solution, -9.2 kcal/mol.

| Group | $N_w^1$ | $E_{nb}^1$ | $\Delta H_w^1$ | $N_w^2$ | $E_{nb}^2$ | $\Delta H_w^2$ | $N_w^3$ | $E_{nb}^3$ | $\Delta H_w^3$ | $\Delta H_h^{max}$ |
|-------|---------|------------|----------------|---------|------------|----------------|---------|------------|----------------|--------------------|
| glud  | 4.5     | -12.3      | -3.1           | 17.0    | -8.6       | .6             | 27      | -9.0       | .2             | 1.7                |
| aspd  | 4.1     | -11.7      | -2.5           | 13.4    | -8.7       | .5             | 27      | -9.0       | .2             | 2.4                |
| lysd  | 4.1     | -11.5      | -2.3           | 15.6    | -8.7       | .5             | 28      | -9.1       | .1             | 1.1                |
| argd  | 4.9     | -10.3      | -1.1           | 18.1    | -8.8       | .4             | 27.8    | -9.2       | 0.0            | 1.9                |
| vald  | 5.7     | -8.7       | .5             | 9.8     | -9.7       | -.5            | 22      | -9.0       | .2             | 2.4                |

Table 8: Enthalpy of unfolding - change in local environment of charged group upon protein unfolding,  $\Delta H_g^U$  (kcal/mol), summed over charged groups of a given type as a function of exposure to solvent, SE, (in %). Group averages,  $\overline{\Delta H_g^U}$ , are averages over each charged group type in the indicated SE range, from 4 proteins. Global averages,  $\widetilde{\Delta H_g^U}$ , are averages over all charged groups in 4 proteins in the indicated SE range.

| Group                                       | Protein                      | $\Delta H_g^U$ |       |       |       |       |        |
|---------------------------------------------|------------------------------|----------------|-------|-------|-------|-------|--------|
|                                             |                              | 0-100          | 0-20  | 20-40 | 40-60 | 60-80 | 80-100 |
| g=<br>COO <sup>-</sup><br>(ASP)             | TRPS                         | +20.6          | +7.6  | 0     | +13.3 | 0     | -.3    |
|                                             | RBNA                         | +25.2          | +4.1  | +12.2 | 0     | +8.9  | 0      |
|                                             | HLYSO                        | +23.0          | +7.5  | +3.5  | +12.0 | 0     | 0      |
|                                             | ALACTA                       | +23.1          | +23.4 | +11.1 | +2    | -5.6  | -6     |
|                                             | $\Sigma \Delta H_g^U$        | +91.9          | +42.6 | +26.8 | +25.5 | +3.3  | -6.3   |
|                                             | $\Sigma N^g$                 | 29             | 10    | 7     | 4     | 6     | 2      |
|                                             | $\overline{\Delta H_g^U}$    | +3.2           | +4.3  | +3.8  | +6.4  | .6    | -3.2   |
| g=<br>COO <sup>-</sup><br>(GLU)             | TRPS                         | +25.4          | +21   | 0     | +3.5  | 0     | +9     |
|                                             | RBNA                         | +14.6          | 0     | +16.8 | -3.1  | -2.6  | +3.5   |
|                                             | HLYSO                        | -1.4           | 0     | 0     | 0     | -1.4  | 0      |
|                                             | ALACTA                       | -2.9           | 0     | +7    | +2.2  | 0     | -5.8   |
|                                             | $\Sigma \Delta H_g^U$        | +35.7          | +21.0 | +17.5 | +2.6  | -4.0  | -1.4   |
|                                             | $\Sigma N^g$                 | 17             | 2     | 4     | 4     | 2     | 5      |
|                                             | $\overline{\Delta H_g^U}$    | +2.1           | +10.5 | +4.4  | +7    | -2.0  | -3     |
| g=<br>Gu(ARG)                               | TRPS                         | +1             | 0     | -1.3  | 0     | +1.4  | 0      |
|                                             | RBNA                         | +4.3           | +9    | +1.9  | +1.7  | -.2   | 0      |
|                                             | HLYSO                        | +3.1           | +3.1  | -1.9  | +4.3  | -.5   | -1.9   |
|                                             | ALACTA                       | +5.2           | 0     | 0     | 0     | 0     | +5.2   |
|                                             | $\Sigma \Delta H_g^U$        | +12.7          | +4.0  | -1.3  | +6    | +7    | +4.3   |
|                                             | $\Sigma N^g$                 | 18             | 2     | 3     | 4     | 5     | 4      |
|                                             | $\overline{\Delta H_g^U}$    | +7             | +2    | -.4   | +1.5  | +1    | +1.1   |
| g=<br>NH <sub>3</sub> <sup>+</sup><br>(LYS) | TRPS                         | +2.4           | +1.5  | -1.8  | +4.0  | -2.7  | +1.4   |
|                                             | RBNA                         | -3.8           | -2.2  | -4.1  | +3.6  | -1.3  | +3     |
|                                             | HLYSO                        | -.3            | 0     | 0     | +1.1  | -1.4  | 0      |
|                                             | ALACTA                       | -7.1           | -1.0  | -4.0  | -1.5  | +1.7  | -2.3   |
|                                             | $\Sigma \Delta H_g^U$        | -8.8           | -1.7  | -9.9  | +6.6  | -3.7  | -.1    |
|                                             | $\Sigma N^g$                 | 40             | 3     | 3     | 11    | 17    | 6      |
|                                             | $\overline{\Delta H_g^U}$    | -.2            | -.6   | -3.3  | +7    | -.2   | -.1    |
| All                                         | $\Sigma \Sigma \Delta H_g^U$ | 131.5          | 65.9  | 33.1  | 38.1  | -3.7  | -3.5   |
| All                                         | $\Sigma \Sigma N^g$          | 104            | 117   | 17    | 23    | 30    | 17     |
| Ave All                                     | $\widetilde{\Delta H_g^U}$   | 1.26           | +3.9  | 1.9   | +1.7  | -.1   | -.2    |

Table 9: Enthalpy of unfolding - contribution from solvent reorganization and structural collapse,  $\Delta H_h^U$  (kcal/mol), summed over charged groups of a given type as a function of exposure to solvent, SE, (in %). Group averages,  $\overline{\Delta H_h^U}$ , are averages over each charged group type in the indicated SE range, from 4 proteins. Global averages,  $\widetilde{\Delta H_h^U}$ , are averages over all charged groups in 4 proteins in the indicated SE range.

| Group                                       | Protein                   | $\Delta H_h^U$ |      |       |       |       |        |
|---------------------------------------------|---------------------------|----------------|------|-------|-------|-------|--------|
|                                             |                           | 0-100          | 0-20 | 20-40 | 40-60 | 60-80 | 80-100 |
| g=<br>COO <sup>-</sup><br>(ASP)             | TRPS                      | 10.1           | 8.4  | 0     | 1.2   | 0     | .5     |
|                                             | RBNA                      | 7.9            | 4.3  | 1.8   | .9    | .9    | 0      |
|                                             | HLYSO                     | 10.8           | 2.4  | 5.2   | 2.3   | 0.9   | 0      |
|                                             | ALACTA                    | 15.3           | 6.5  | 4.7   | 1.1   | 2.7   | .3     |
|                                             | $\Sigma \Delta H_h^U$     | 43.1           | 21.6 | 11.7  | 5.5   | +3.5  | .8     |
|                                             | $\Sigma N^g$              | 29             | 10   | 7     | 4     | 6     | 2      |
|                                             | $\overline{\Delta H_h^U}$ | 1.48           | 2.2  | 1.7   | 1.4   | .6    | .4     |
| g=<br>COO <sup>-</sup><br>(GLU)             | TRPS                      | 4.3            | 3.4  | 0     | .9    | 0     | 0      |
|                                             | RBNA                      | 3.9            | 0    | 2.3   | 1.0   | .3    | .3     |
|                                             | HLYSO                     | .6             | 0    | 0     | 0     | .6    | 0      |
|                                             | ALACTA                    | 4.5            | 0    | 2.3   | 1.7   | 0     | .5     |
|                                             | $\Sigma \Delta H_h^U$     | 13.1           | 3.4  | 4.6   | 3.6   | 1.7   | .8     |
|                                             | $\Sigma N^g$              | 17             | 2    | 4     | 4     | 2     | 5      |
|                                             | $\overline{\Delta H_h^U}$ | .8             | 1.7  | 1.2   | .8    | .9    | .2     |
| g=<br>Gu(ARG)                               | TRPS                      | 2.0            | 0    | 1.4   | 0     | .6    | 0      |
|                                             | RBNA                      | 4.7            | 1.6  | 1.5   | 1.1   | .5    | 0      |
|                                             | HLYSO                     | 9.5            | 1.9  | 1.6   | 3.5   | 2.2   | .3     |
|                                             | ALACTA                    | 0              | 0    | 0     | 0     | 0     | 0      |
|                                             | $\Sigma \Delta H_h^U$     | 16.2           | 3.5  | 4.5   | 4.6   | 3.3   | .3     |
|                                             | $\Sigma N^g$              | 18             | 2    | 3     | 4     | 5     | 4      |
|                                             | $\overline{\Delta H_h^U}$ | .9             | 1.8  | 1.5   | 1.2   | .7    | .1     |
| g=<br>NH <sub>3</sub> <sup>+</sup><br>(LYS) | TRPS                      | 6.3            | .9   | .5    | 2.3   | 2.5   | .3     |
|                                             | RBNA                      | 4.4            | .9   | .8    | 2.1   | .3    | + .3   |
|                                             | HLYSO                     | 2.0            | 0    | 0     | .5    | 1.5   | 0      |
|                                             | ALACTA                    | 5.3            | 1.1  | .8    | 1.4   | 1.8   | .2     |
|                                             | $\Sigma \Delta H_h^U$     | 18.2           | 2.9  | 2.1   | 6.3   | 5.3   | .8     |
|                                             | $\Sigma N^g$              | 40             | 3    | 3     | 11    | 17    | 6      |
|                                             | $\overline{\Delta H_h^U}$ | .5             | 1.0  | .7    | .6    | .3    | .1     |
| All                                         | $\Sigma \Delta H_h^U$     | 90.6           | 31.4 | 22.9  | 20.0  | 13.8  | 2.7    |
| All                                         | $\Sigma N^g$              | 104            | 17   | 17    | 23    | 30    | 17     |
| All Ave                                     | $\widetilde{\Delta H^U}$  | .9             | 1.8  | 1.3   | .9    | .03   | .16    |
